# Supplementary material for: Two-dimensional stimulated resonance Raman spectroscopy study of the Trp-cage peptide folding
Source: Royal Society of Chemistry journal article supplement (doi:10.1039/c3cp51347e), 2013-01-01
Supplement: c3cp51347e.pdf [file c3cp51347e.pdf]

## Supporting Information “Two-dimensional Stimulated Resonance Raman Spectroscopy Study of the Trp-cage Protein Folding”

Hao Ren,<sup>1</sup> Zai-Zhi Lai,<sup>2</sup> Jason D. Biggs,<sup>1</sup> Jin Wang,<sup>2</sup> and Shaul Mukamel<sup>1,\*</sup>

<sup>1</sup>*Department of Chemistry, University of California, Irvine, California, 92697, USA.*

<sup>2</sup>*Department of Chemistry, State University of New York at Stony Brook,  
Stony Brook, New York 11794, USA*

(Dated: March 29, 2013)

---

\* Corresponding author; Email: [smukamel@uci.edu](mailto:smukamel@uci.edu)

- [1] D. Healion, J. D. Biggs, and S. Mukamel, Phys. Rev. A **86**, 033429 (2012).

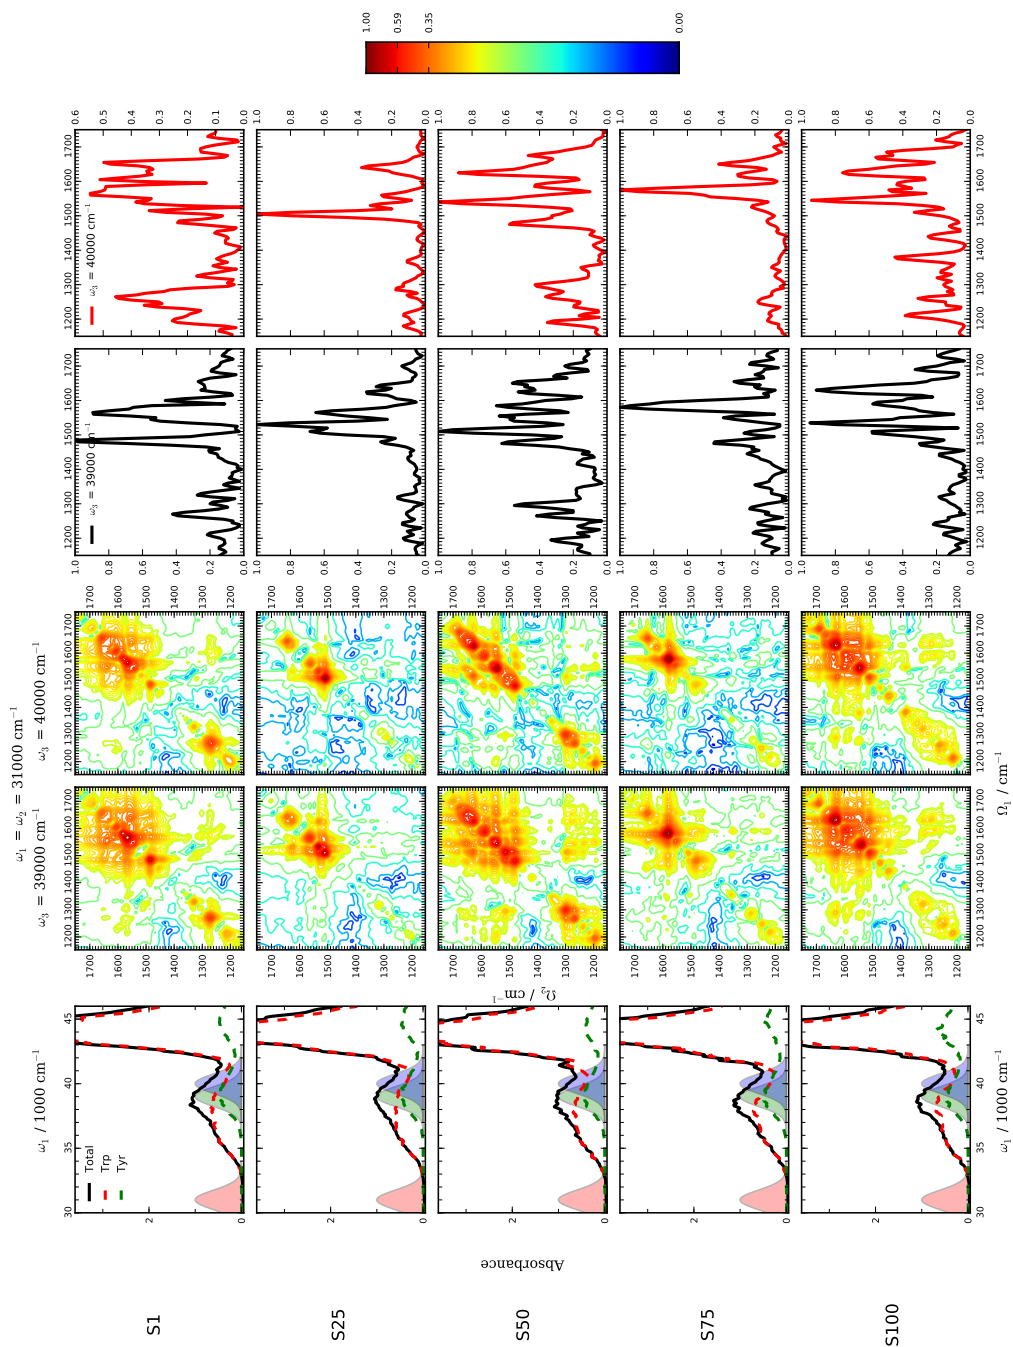

Fig. S 1. Same as Fig. 5 but for the XXX pulse polarization configuration.

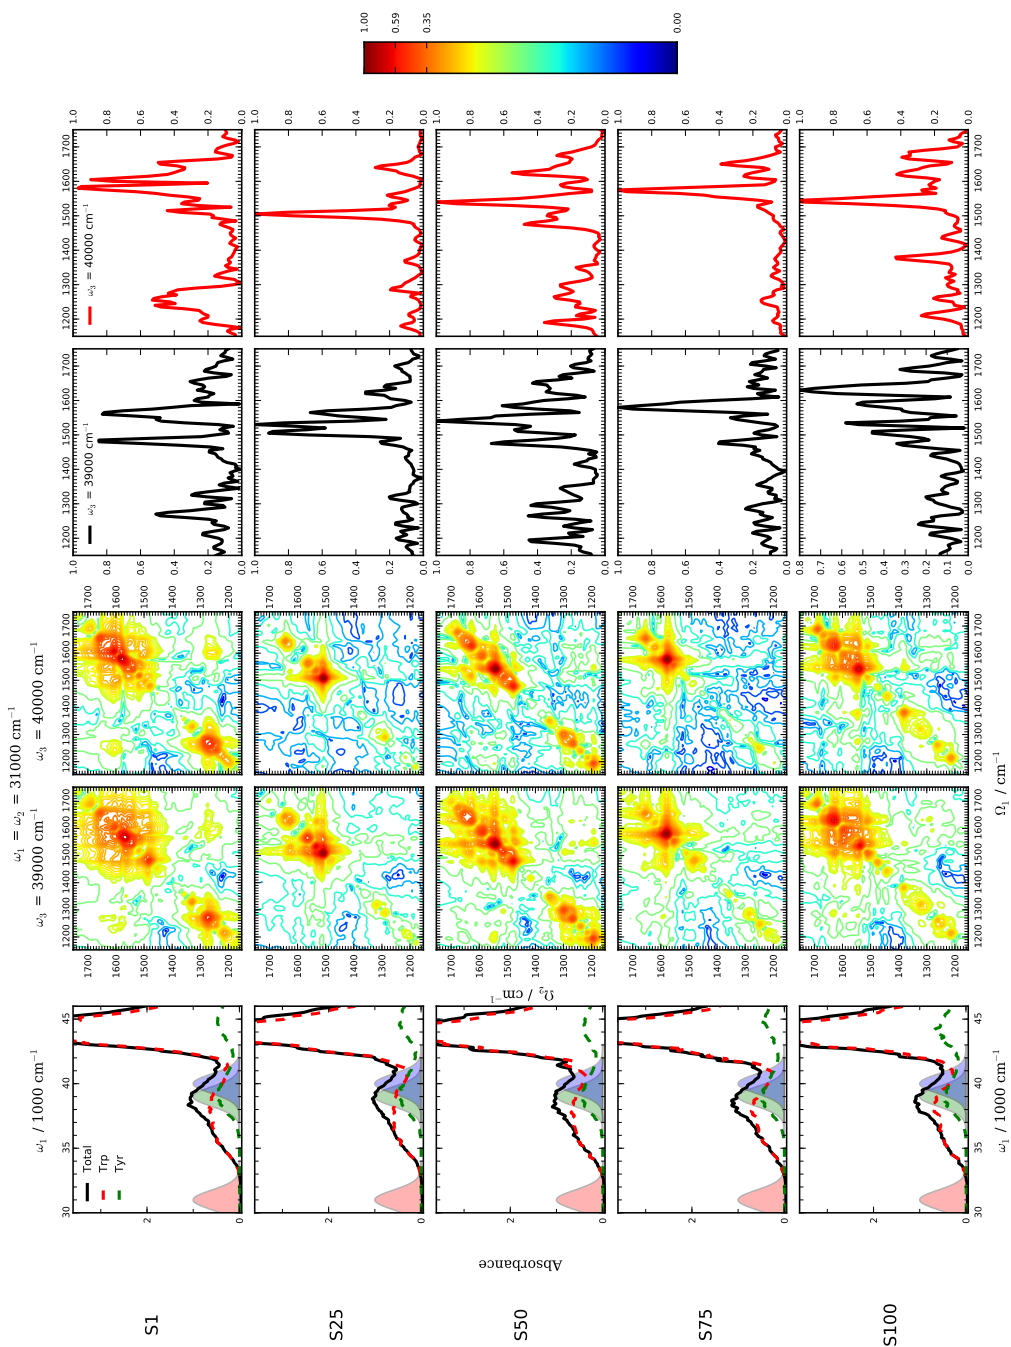

Fig. S 2. Same as Fig. 5 but for the super magic angle (SMA) [1] pulse polarization configuration.
